# Supplementary material for: Enhanced Healing and Antimicrobial Efficacy of Chitosan-g-Polyacrylamide in a Rat Model of Gingival Ulcers
Source: PubMed Central journal article supplement (PMC7193946; doi:10.3389/fchem.2020.00273), 2020-04-24
Supplement: Image_1.pdf [file Image_1.pdf]

## Supplementary Materials

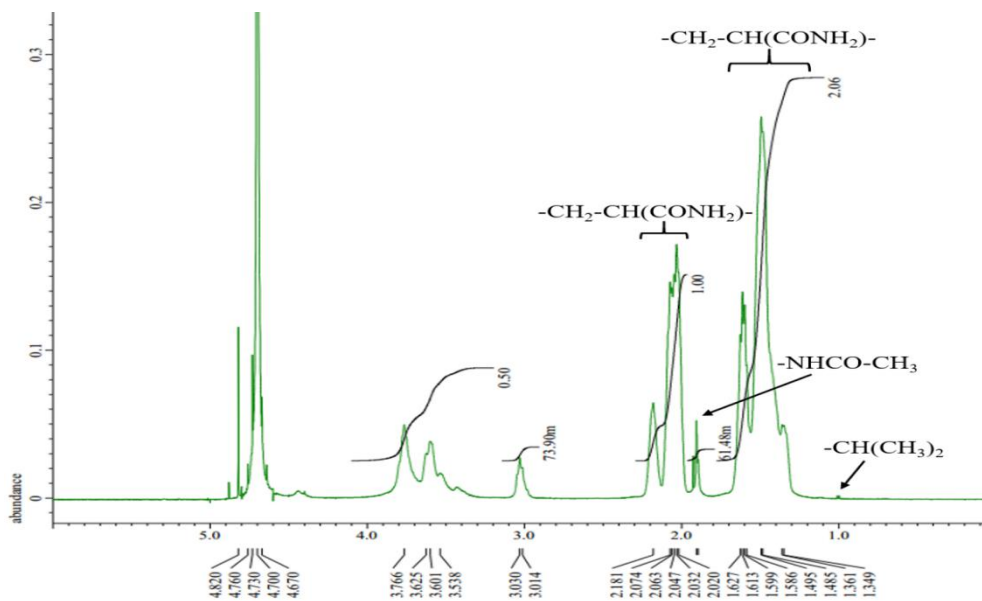

Supporting Figure S1. <sup>1</sup>H NMR spectra of PAM-CS copolymer, D<sub>2</sub>O containing DCI 0.1 M as the solvent.

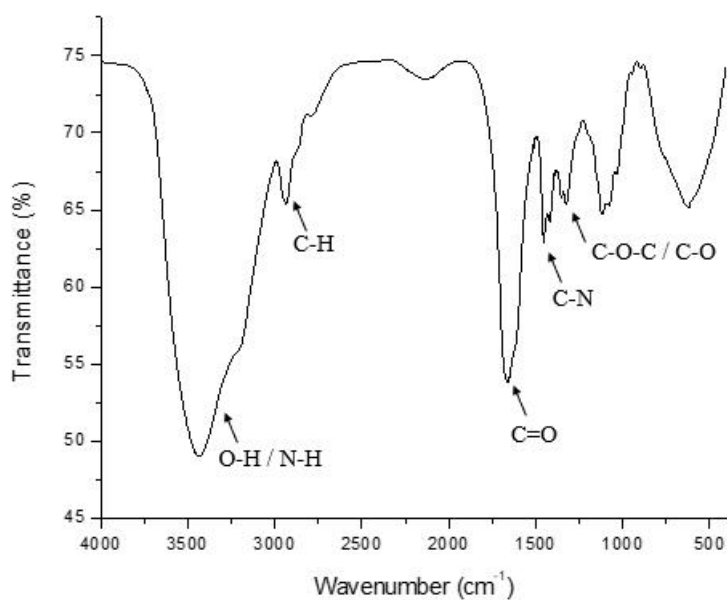

Supporting Figure S2. FTIR spectra of PAM-CS copolymer in potassium bromide pellet (4000-400cm<sup>-1</sup> region) on Perkin-Elmer FTIR2000 spectrometer.
